# Supplementary material
Source: Springer Nature journal article supplement (https://www.springermedizin.de/resource/supplementary/11689_2014_107_MOESM1_ESM.pdf/9673230)

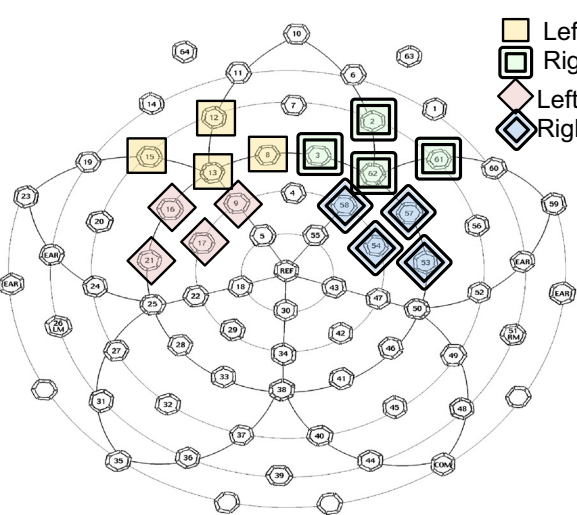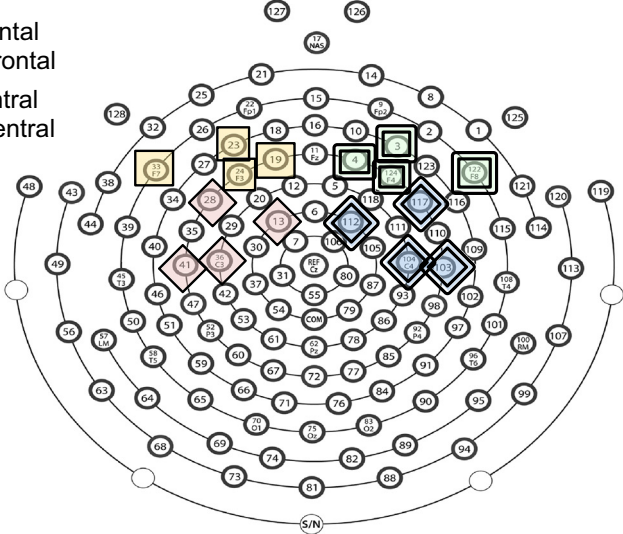

Supplement: MOESM1 [file 9673230]
